# Supplementary material for: The Rice GLYCINE-RICH PROTEIN 3 Confers Drought Tolerance by Regulating mRNA Stability of ROS Scavenging-Related Genes
Source: PubMed Central journal article supplement (PMC7979854; doi:10.1186/s12284-021-00473-0), 2021-03-19
Supplement: 12284_2021_473_MOESM5_ESM.pdf [file 12284_2021_473_MOESM5_ESM.pdf]

**Table S5. Analysis of half-life in non-transgenic, *OsGRP3<sup>OE</sup>* and *OsGRP3<sup>KD</sup>* transgenic plants.**

| Gene                                  | Plants                     | Half-life         | Equation |   |              |
|---------------------------------------|----------------------------|-------------------|----------|---|--------------|
|                                       |                            | min               | a        | b | Y=aX+b       |
| <i>PR5</i>                            | NT                         | 115.38            | -0.00433 | 1 | y=-0.0043x+1 |
|                                       | <i>OsGRP3<sup>OE</sup></i> | 187.50            | -0.00267 | 1 | y=-0.0026x+1 |
|                                       | <i>OsGRP<sup>KD</sup></i>  | 93.75             | -0.00533 | 1 | y=-0.0053x+1 |
| <i>PR5</i><br>(Drought) <sup>b</sup>  | NT                         | 263.16            | -0.00190 | 1 | y=-0.0019x+1 |
|                                       | <i>OsGRP3<sup>OE</sup></i> | N.D. <sup>a</sup> | 0.00160  | 1 | y=0.0016x+1  |
|                                       | <i>OsGRP<sup>KD</sup></i>  | 238.10            | -0.00210 | 1 | y=-0.0021x+1 |
| <i>MT1d</i>                           | NT                         | 187.50            | -0.00267 | 1 | y=-0.0026x+1 |
|                                       | <i>OsGRP3<sup>OE</sup></i> | 107.14            | -0.00467 | 1 | y=-0.0046x+1 |
|                                       | <i>OsGRP<sup>KD</sup></i>  | 250.00            | -0.00200 | 1 | y=-0.0020x+1 |
| <i>MT1d</i><br>(Drought) <sup>b</sup> | NT                         | N.D. <sup>a</sup> | 0.00317  | 1 | y=0.0031x+1  |
|                                       | <i>OsGRP3<sup>OE</sup></i> | N.D. <sup>a</sup> | 0.00177  | 1 | y=0.0017x+1  |
|                                       | <i>OsGRP<sup>KD</sup></i>  | N.D. <sup>a</sup> | 0.00383  | 1 | y=0.0038x+1  |
| <i>DOPA</i>                           | NT                         | 306.75            | -0.00163 | 1 | y=-0.0016x+1 |
|                                       | <i>OsGRP3<sup>OE</sup></i> | 409.84            | -0.00122 | 1 | y=-0.0013x+1 |
|                                       | <i>OsGRP<sup>KD</sup></i>  | 204.08            | -0.00245 | 1 | y=-0.0023x+1 |
| <i>LOX</i>                            | NT                         | 427.34            | -0.00119 | 1 | y=-0.0013x+1 |
|                                       | <i>OsGRP3<sup>OE</sup></i> | 230.41            | -0.00217 | 1 | y=-0.0023x+1 |
|                                       | <i>OsGRP<sup>KD</sup></i>  | 462.96            | -0.00098 | 1 | y=-0.0013x+1 |

<sup>a</sup>Not Determined, half-lives were not determined due to positive value of slope. <sup>b</sup>Stability of RNAs was analyzed under drought conditions.
